# Supplementary material
Source: Royal Society of Chemistry journal article supplement (doi:10.1039/d6nj00397d)
Supplement: d6nj00397d1.pdf [file d6nj00397d1.pdf]

1 Microwave-synthesized Cu-modified  $g\text{-C}_3\text{N}_4$  for efficient mold resistance of wood and  
2 bamboo

3

4 Dayong Zhou,<sup>\*a</sup> Fuhua Zhou<sup>b</sup> and Mingli Chen<sup>c</sup>

5

6 <sup>a</sup>Department of Chemistry, College of Sciences, Northeastern University, Shenyang 100819,  
7 China

8 <sup>b</sup>College of Environmental Science and Engineering, Beijing Forestry University, Beijing  
9 100083, China

10

11 <sup>\*</sup>Corresponding author. E-mail: 2390002@stu.neu.edu.cn

12

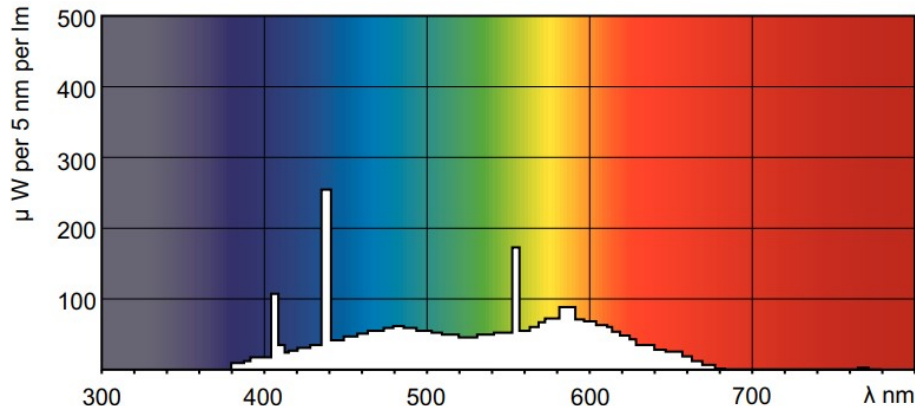

13

14 Figure S1. Spectral power distribution color of Philips TLD30W/54.

15

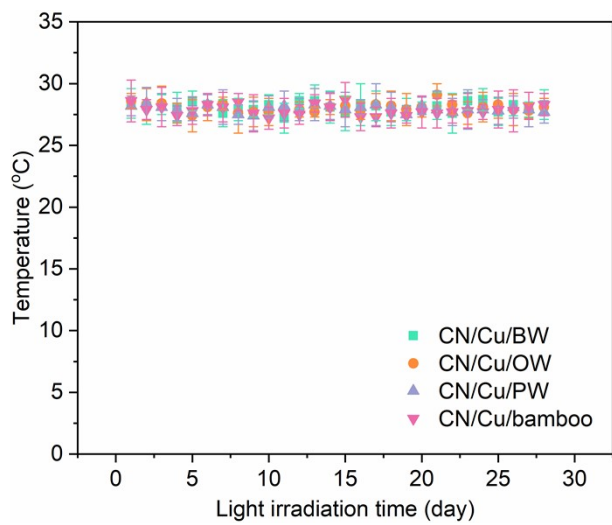

16

17 Figure S2. Surface temperatures of CN/Cu/BW, CN/Cu/OW, CN/Cu/PW and CN/Cu/bamboo  
18 in mold resistance experiments.

19

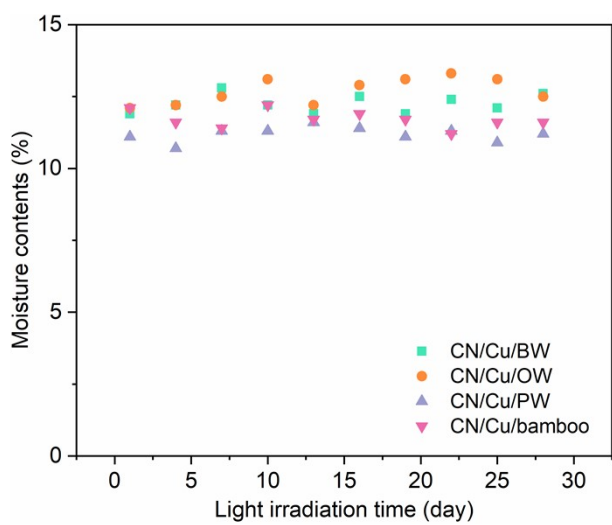

20

21 Figure S3. Moisture contents of CN/Cu/BW, CN/Cu/OW, CN/Cu/PW and CN/Cu/bamboo in  
22 mold resistance experiments.

23

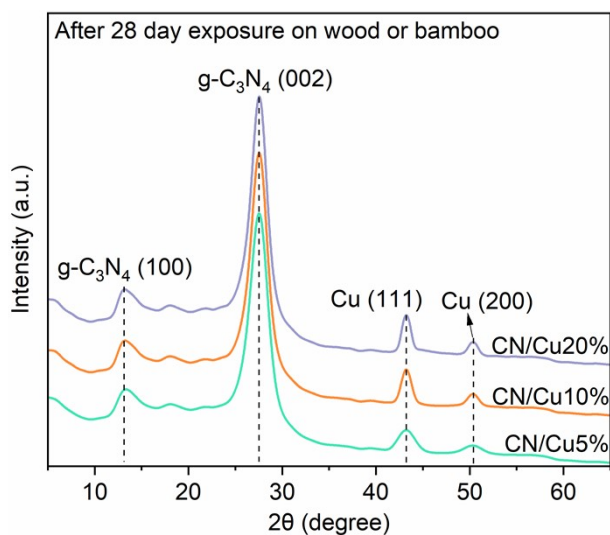

24

25 Figure S4. XRD patterns of CN/Cu5%, CN/Cu10%, and CN/Cu20% after 28 days of exposure.

26

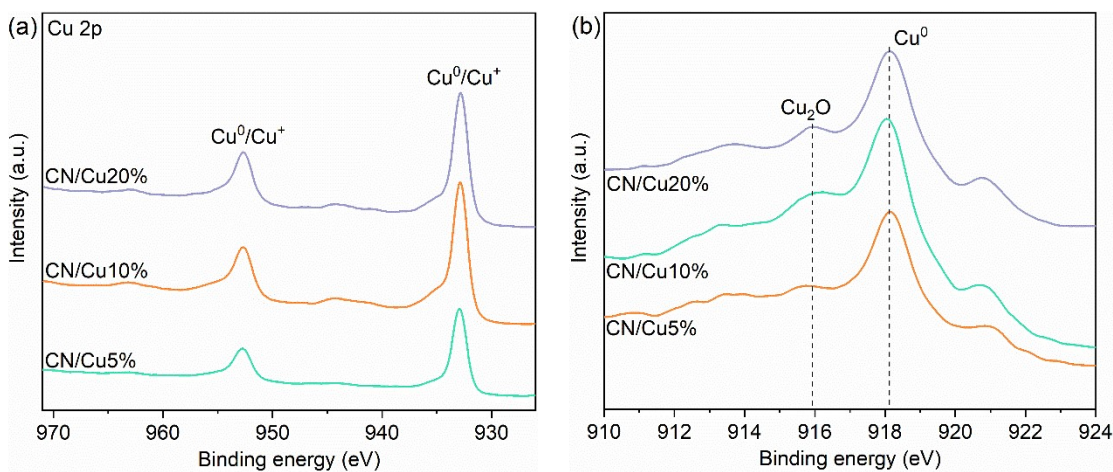

27

28 Figure S5. Cu 2p (a) and Cu LMM (b) spectra of CN/Cu5%, CN/Cu10%, and CN/Cu20%.

29

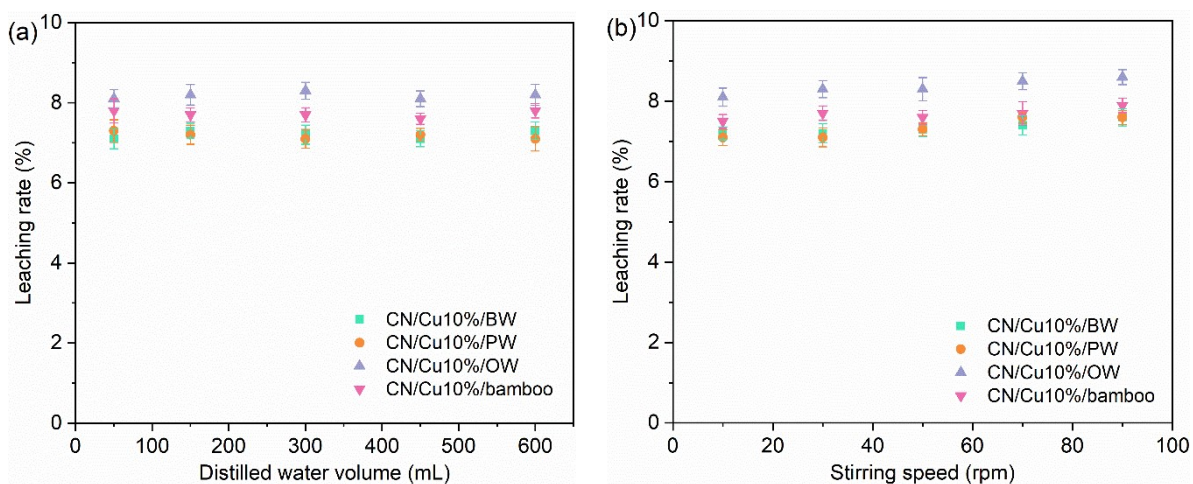

30

31 Figure S6. Effects of distilled water volume (a) and stirring speed (b) on leaching rate.

32

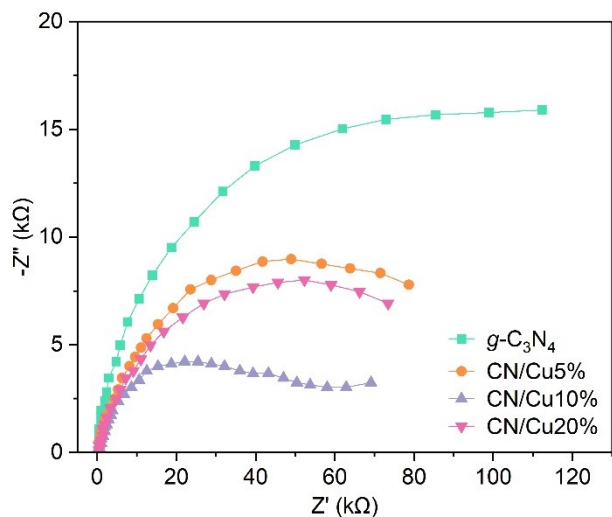

33  
34 Figure S7. EIS of  $g\text{-C}_3\text{N}_4$ , CN/Cu5%, CN/Cu10% and CN/Cu20%.

35

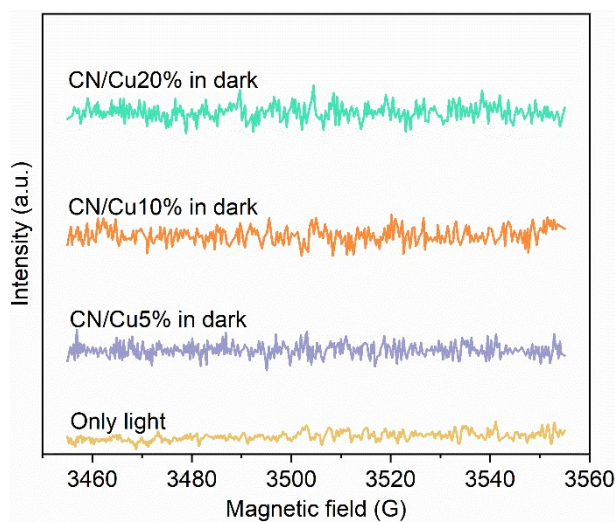

36  
37 Figure S8. EPR signals of CN/Cu5%, CN/Cu10%, and CN/Cu20% in dark and under only  
38 light.

39

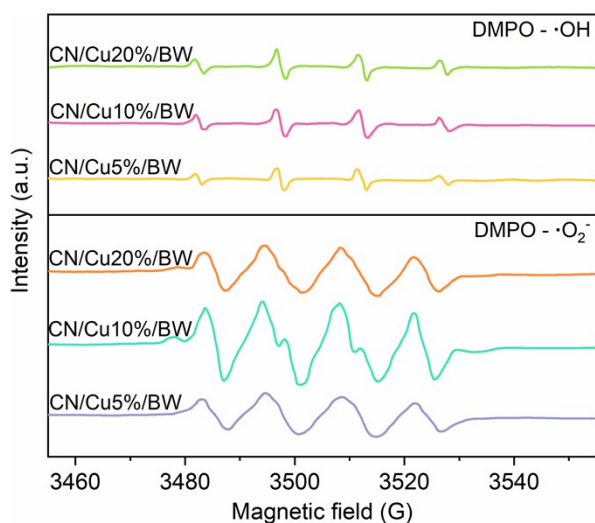

40  
41 Figure S9. EPR spectra of CN/Cu/BW.

42

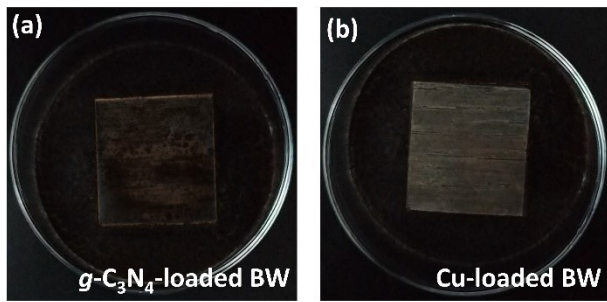

43

44 Figure S10. Anti-mold evaluation of  $g\text{-C}_3\text{N}_4$ -loaded BW under visible light irradiation (a) and  
45 Cu-loaded BW (b).

46

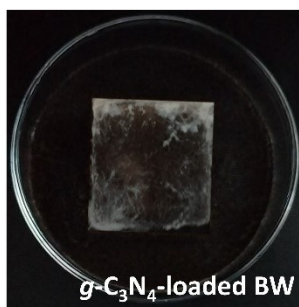

47

48 Figure S11. Anti-mold evaluation of CN/Cu10%/BW in dark.

49

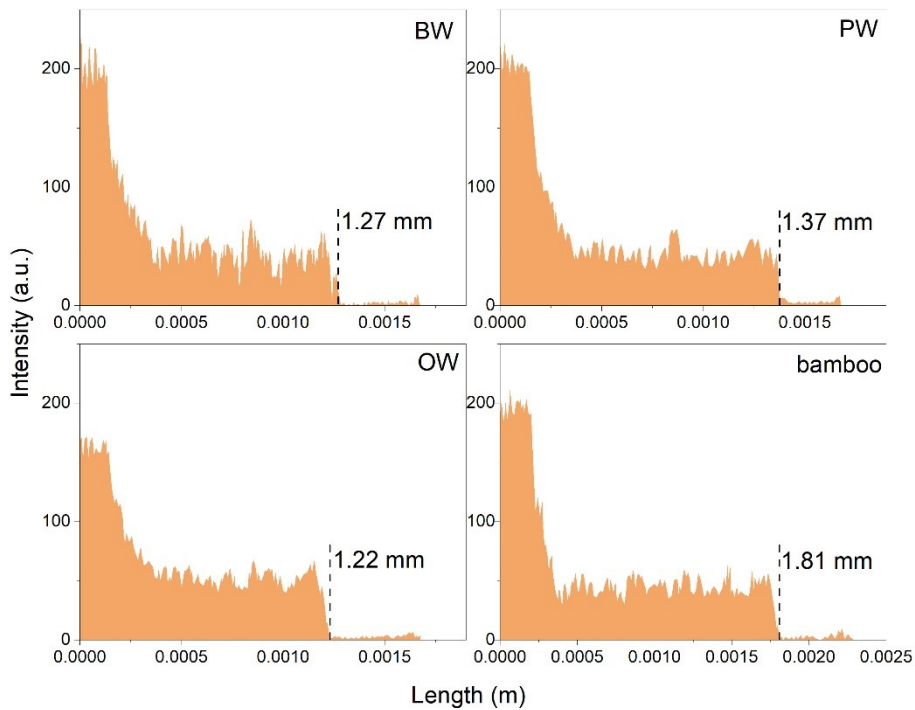

50

51 Figure S12. Penetration depths across BW/PW/OW/bamboo determined by cross-sectional  
52 SEM/EDS line scans.

53

54 Table S1. Standard to evaluate the infection values (Chinese Standard GB/T 18261-2013).

| Infection value | Coverage of mold                       |
|-----------------|----------------------------------------|
| 0               | No fungal growth on the sample surface |
| 1               | Surface infection area $< 1/4$         |
| 2               | Surface infection area $1/4—1/2$       |
| 3               | Surface infection area $1/2—3/4$       |
| 4               | Surface infection area $> 3/4$         |

55
